# Supplementary material
Source: Springer Nature journal article supplement (https://www.springermedizin.de/resource/supplementary/12889_2013_6565_MOESM4_ESM.docx/9498356)
Supplement: MOESM4 [file 9498356]

Table 1 – Examples of components of the service delivery function in a range of HOs

|  | **Hospital** | **First line system** | **Disease control programme** | **NGO supporting districts** | **NGO supporting other NGOs** |
| --- | --- | --- | --- | --- | --- |
| **Actual service provision** | Provision of hospital-level diagnosis and care | Health promotion, prevention and curative care | Vector control  Environmental control  Information, Education and Communication  Curative services | Training district management teams  Providing supplies and drugs  Provision of targeted services | Training NGO managers  Providing material support |
| **Operational management** | Management of wards  Procurement  Pharmacy  Quality management  Health information system  Continued professional development | Team management  Supplies  Training  Supervision  Quality management  Health information system | Programme management  Financial management  Coordination with general services  Procurement & supply  Quality control  Health information system | Coordination with general services  Staff recruitment & training  Monitoring & evaluation  Supervision | Coordination of own staff  Communication with the NGOs that are supported  Supervision of own staff  Monitoring & evaluation |
